# Supplementary material for: Mobility and phase transitions of the [EMIm+][FSI−] ionic liquid confined in micro- and mesoporous carbons
Source: Royal Society of Chemistry journal article supplement (doi:10.1039/d1ta10367a), 2022-01-01
Supplement: d1ta10367a1.pdf [file d1ta10367a1.pdf]

## Electronic Supplementary Information (ESI)

### Mobility and phase transitions of the [EMIm<sup>+</sup>][FSI<sup>-</sup>] ionic liquid confined in micro- and mesoporous carbons

Paula Ratajczak<sup>a\*</sup>, Christopher Bachetzky<sup>b\*</sup>, Zhuanpei Wang<sup>a\*</sup>, Agnieszka Chojnacka<sup>a</sup>, Natalia Fulik<sup>b</sup>, Emmanuel Pamet a<sup>a</sup>, SEM Pourhosseini<sup>a</sup>, Eike Brunner<sup>b</sup>, Francois Beguin<sup>a†</sup>

<sup>a</sup> Poznan University of Technology, Institute of Chemistry and Technical Electrochemistry, Berdychowo 4, 60-965 Poznan, Poland

<sup>b</sup> TU Dresden, Faculty of Chemistry and Food Chemistry, 01062 Dresden, Germany

\* co-first authorship.

† corresponding author: [francois.beguin@put.poznan.pl](mailto:francois.beguin@put.poznan.pl)

#### 1. Deconvolution of the DSC thermograms of IL@STC-20-1 and IL@STC-12-1

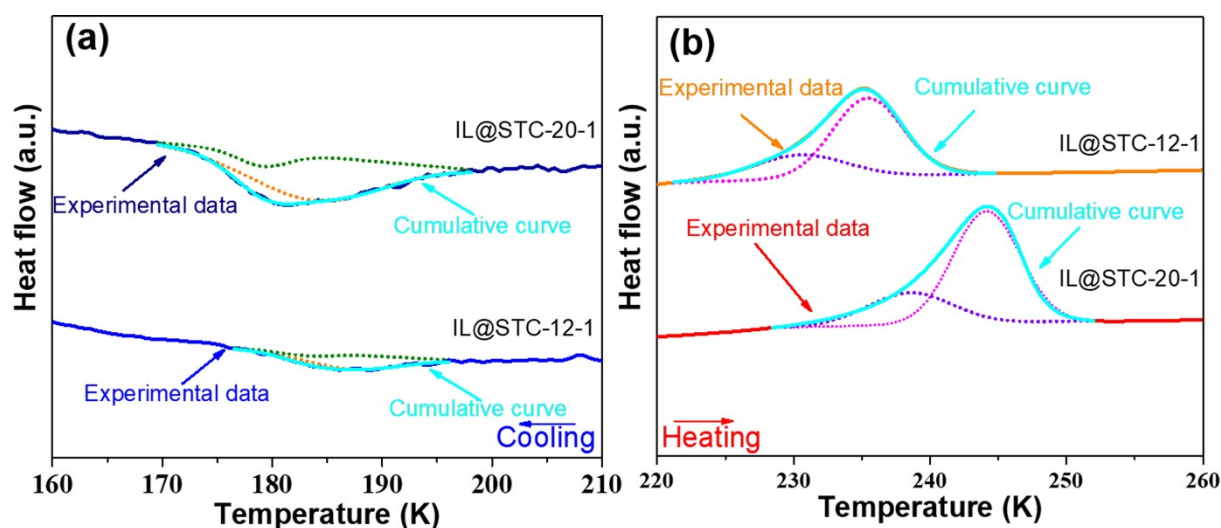

**Figure S1.** DSC thermograms and their fitting by using two Gaussian curves for [EMIm<sup>+</sup>][FSI<sup>-</sup>] confined in the STC-20-1 and STC-12-1 carbons (IL@STC-20-1 and IL@STC-12-1, respectively) upon (a) cooling and (b) heating at a rate of 10 K min<sup>-1</sup>.

2. NMR spectra of [EMIm<sup>+</sup>][FSI] confined in the micro- and mesoporous carbons

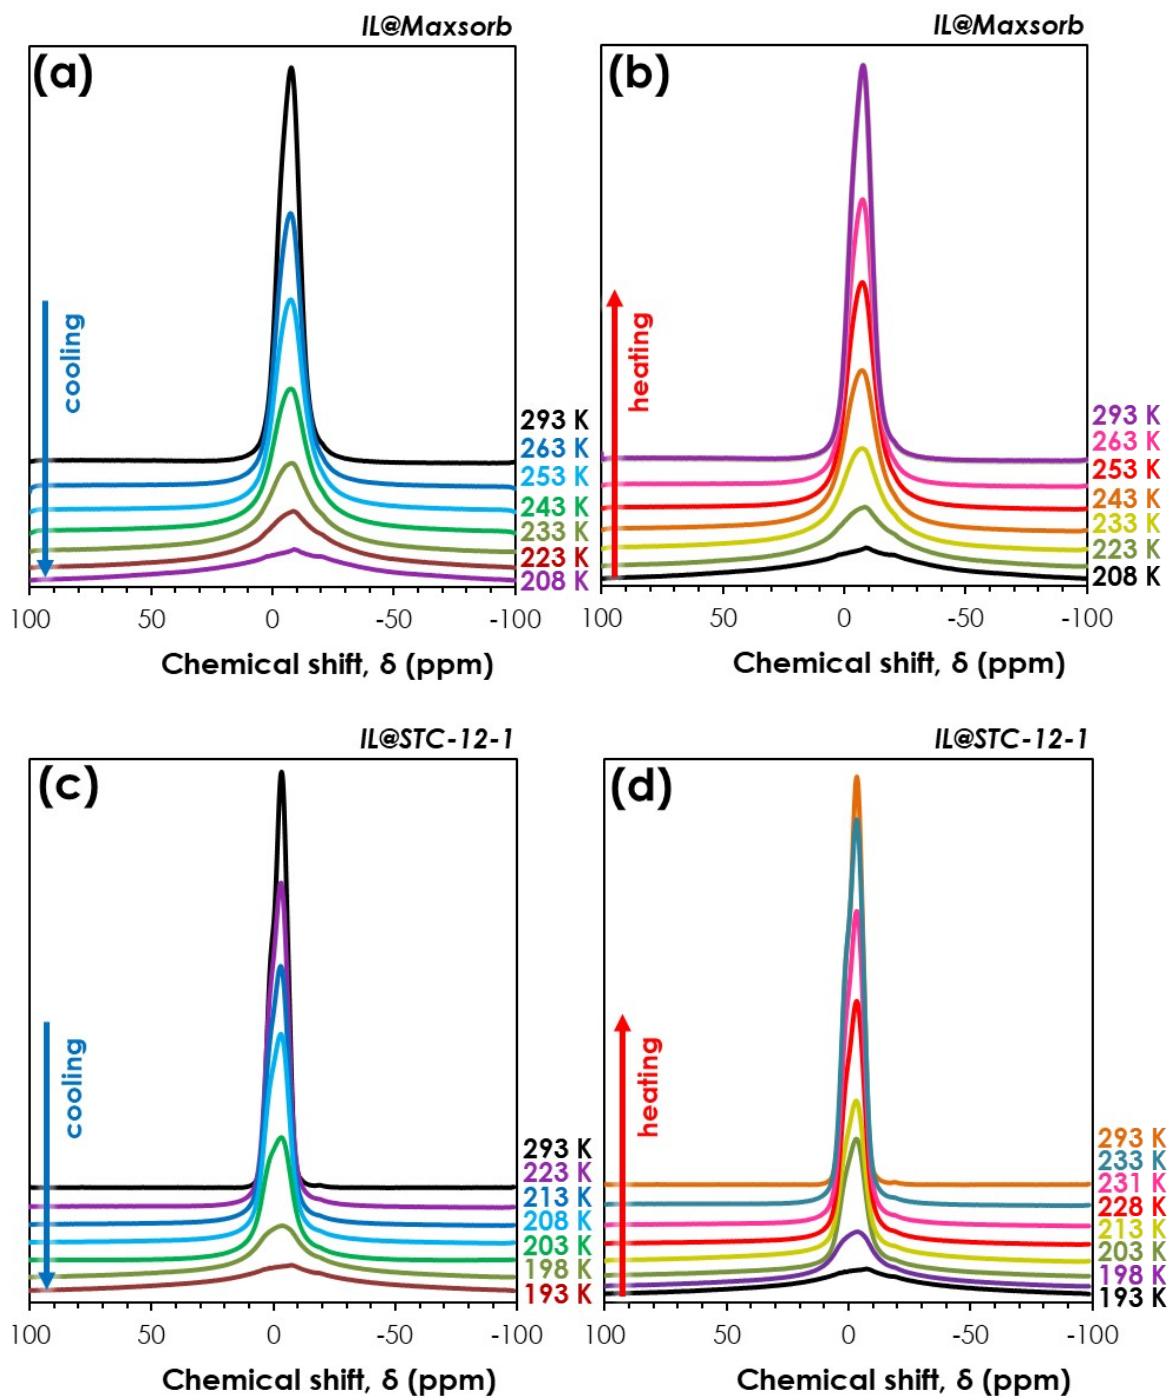

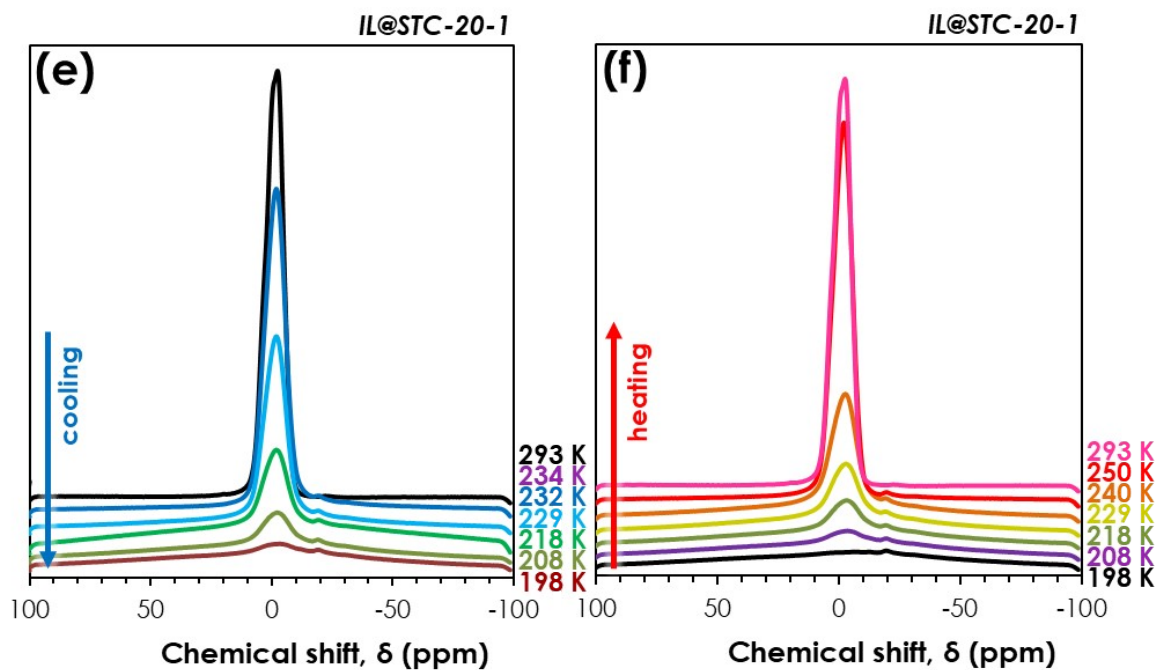

**Figure S2.** Static  $^1\text{H}$  NMR spectra of  $[\text{EMIm}^+][\text{FSI}^-]$  confined in (a, b) Maxsorb, (c, d) STC-12-1 and (e, f) STC-20-1 under (a, c, e) cooling and (b, d, f) heating. In order to allow a quantitative comparison between the spectra, the detected intensities were normalized by multiplication with the factor  $T/293\text{ K}$  (which accounts for the temperature-dependence of the magnetization) [1].

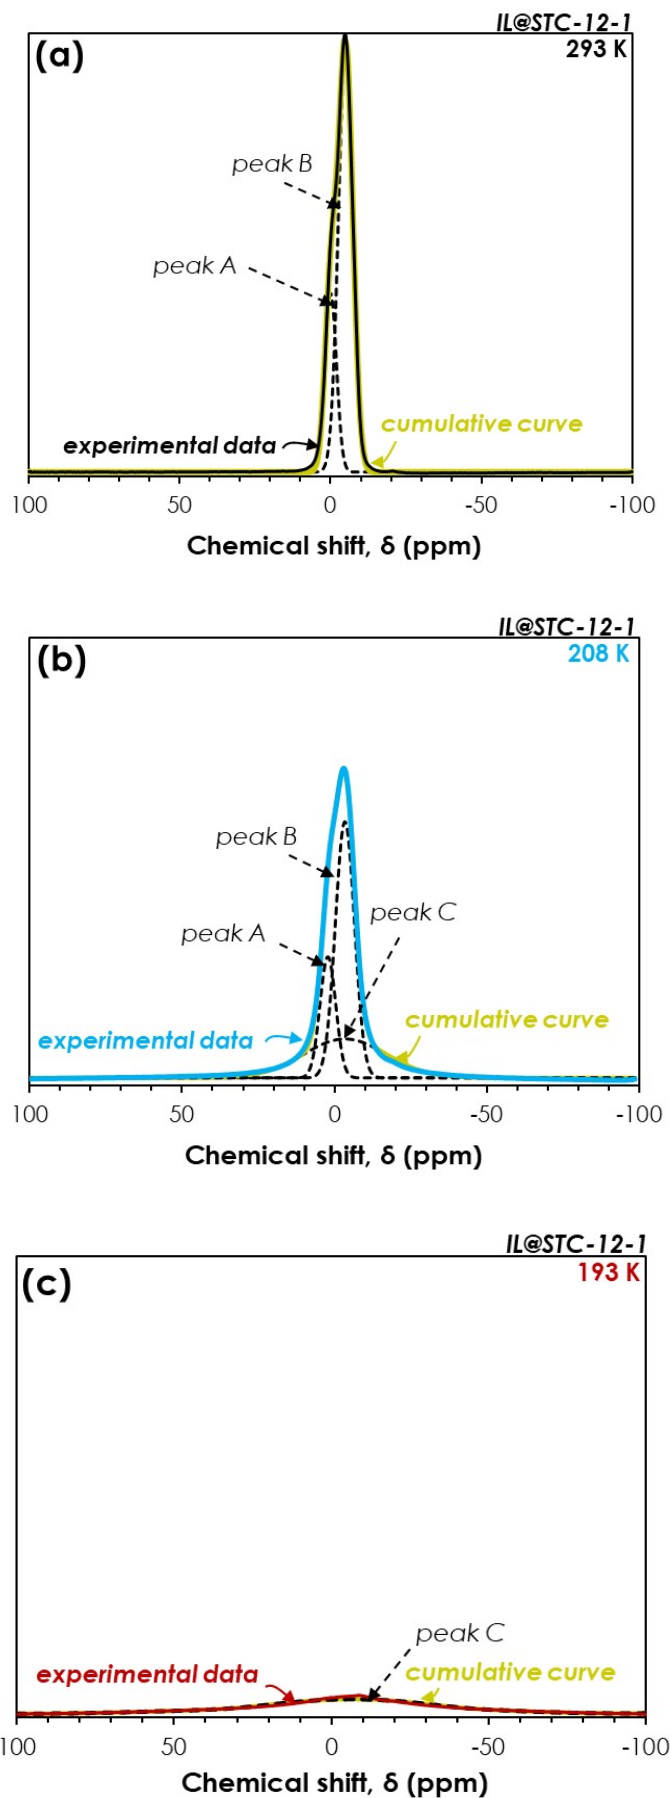

**Figure S3.** Deconvolution of the static  $^1\text{H}$  NMR spectra of IL@STC-12-1 recorded at (a) 293 K, (b) 208 K and (c) 193 K under cooling (data from **Figure S2c**).

### 3. Surface functionality of the carbon materials

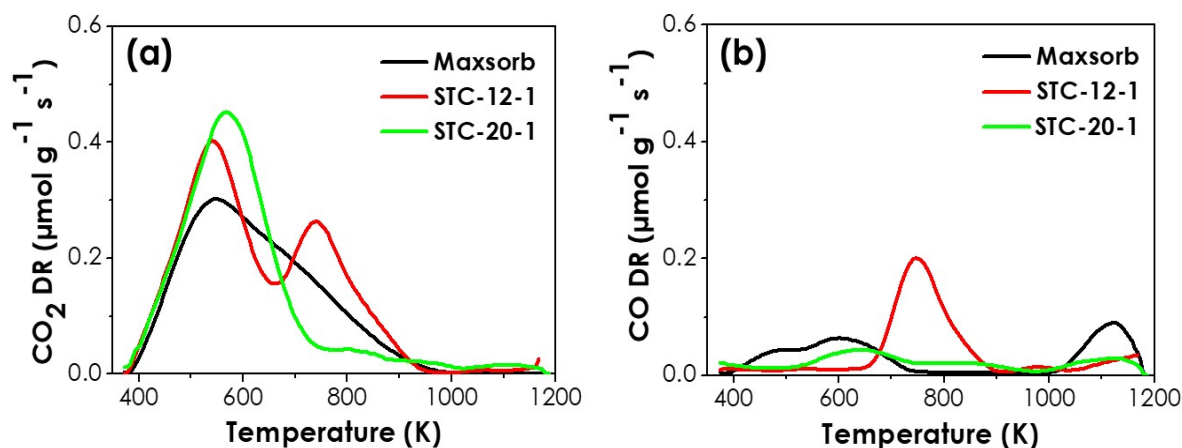

**Figure S4.** TPD analysis of the Maxsorb, STC-12-1, and STC-20-1 carbons: (a) CO<sub>2</sub> and (b) CO desorption.

**Table S1.** TPD data of the Maxsorb, STC-12-1, and STC-20-1 carbons (mass loss at 1223 K, amount of desorbed CO, CO<sub>2</sub>, H<sub>2</sub>O, and total amount of evolved oxygen (O)).

| Carbon   | Mass loss<br>(wt. %) | CO<br>(μmol g <sup>-1</sup> ) | CO <sub>2</sub><br>(μmol g <sup>-1</sup> ) | H <sub>2</sub> O<br>(μmol g <sup>-1</sup> ) | O<br>(wt. %) |
|----------|----------------------|-------------------------------|--------------------------------------------|---------------------------------------------|--------------|
| Maxsorb  | 3.0                  | 319                           | 87                                         | 248                                         | 1.6          |
| STC-12-1 | 3.4                  | 441                           | 135                                        | 519                                         | 2.5          |
| STC-20-1 | 2.0                  | 292                           | 53                                         | 328                                         | 1.5          |

**Figure S4** shows the temperature programmed desorption (TPD) rates of CO<sub>2</sub> and CO for the three carbons; the quantitative data as mass loss and amount of desorbed CO, CO<sub>2</sub>, H<sub>2</sub>O, and oxygen are reported in Table S1. The CO<sub>2</sub> desorption observed for Maxsorb between 400 and 950 K (**Figure S4a**) reveals the presence of carboxylic functionalities (evolving up to around 800 K) and lactones (evolving between 700 and 950 K) [2]. Besides, the MS thermograms in **Figure S4b** indicate that Maxsorb contains a small amount of carbonyl groups, namely aldehydes/ketones and quinones, desorbed as CO up to about 750 K and above 1000 K, respectively [2, 3]. On the other hand, the surface of the STC-12-1 carbon is characterized by the presence of carboxylic functionalities (evolving as CO<sub>2</sub> up to around 700 K; **Figure S4a**) and anhydrides (releasing CO<sub>2</sub> as well as CO between 600 and 950 K; **Figure S2a** and **b**, respectively) [3]. In the case of the STC-20-1 carbon, the CO<sub>2</sub> desorption (**Figure S2a**) is related to the decomposition of carboxylic functionalities (evolving up to around 750 K) as well

as a very small amount of lactones (evolving between 700 and 1000 K), whereas CO evolution (Figure 2b) indicates the presence of a small number of aldehydes/ketones (evolving between 500 and 800 K) [2, 3]. The slightly higher (by 1 wt.%) surface oxygen content in STC-12-1 than in STC-20-1 (**Table S1**) is probably related to a higher density of siloxane and silanol (charged and uncharged, viz. SiO<sup>-</sup> and SiOH, respectively) groups on the surface of the silica template of STC-12-1, due to the smaller diameter of the SiO<sub>2</sub> particles (12 nm) [4]. Indeed, during the final thermal treatment of the carbon/silica composite at 1173 K, oxygenated functionalities can be created on the carbon surface by carboreduction of the SiO<sup>-</sup> and SiOH surface species of silica [5]. Overall, the low mass loss and low amount of evolved oxygen confirm that the three carbons are surface clean materials with a negligible amount of surface oxygenated functionalities.

#### 4. Volume of a monolayer of [EMIm<sup>+</sup>]/[FSI<sup>-</sup>] confined in mesoporous carbons

The cumulative DFT surface area of the STC-12-1 and STC-20-1 carbons vs. their pore size is presented in **Figure S5**. The surface area due to mesopores ( $S_{\text{meso}}$  for pores between ca. 5 and 15 nm) was estimated by subtracting the surface area due to micropores ( $S_{\text{micro}}$  for pores below 2 nm) from the total surface area ( $S_{\text{DFT}} = S_{\text{micro}} + S_{\text{meso}}$ ; the cumulative surface area values due to micropores and mesopores are reported in **Table S2**).

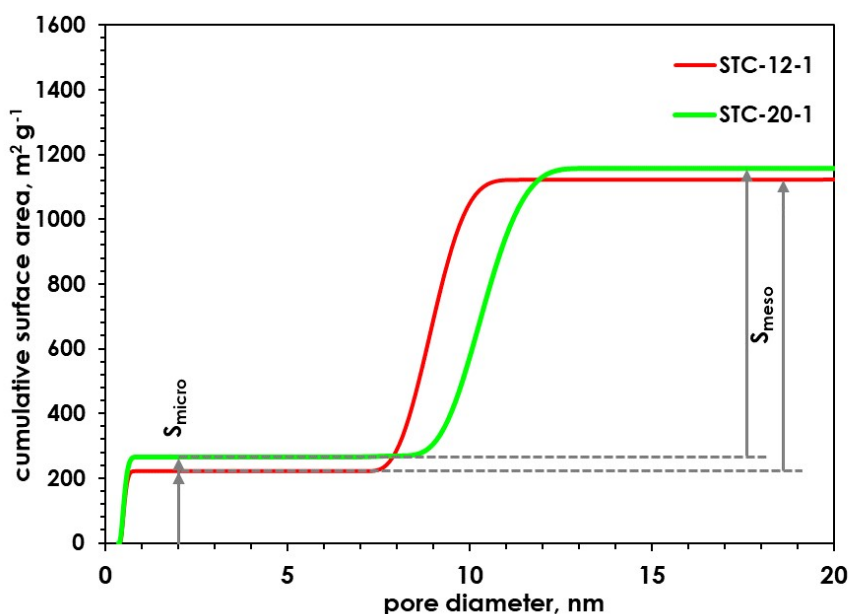

**Figure S5.** Cumulative DFT surface area vs. pore diameter of the STC-12-1 and STC-20-1 carbons; the vertical arrows represent the respective values of surface area due to micro- and mesopores ( $S_{\text{micro}}$  and  $S_{\text{meso}}$ , respectively); note that, similarly to the pore size distribution shown in **Figure 1a** of the manuscript, the curves of the two carbons are totally flat between ca. 1 and 7 nm.

**Table S2.** Cumulative surface area due to micro- and mesopores ( $S_{\text{micro}}$  and  $S_{\text{meso}}$ , respectively) for the STC-12-1 and STC-20-1 carbons.

| Carbon   | $S_{\text{DFT}}$<br>( $\text{m}^2 \text{g}^{-1}$ ) | $S_{\text{micro}}$<br>( $\text{m}^2 \text{g}^{-1}$ ) | $S_{\text{meso}}$<br>( $\text{m}^2 \text{g}^{-1}$ ) |
|----------|----------------------------------------------------|------------------------------------------------------|-----------------------------------------------------|
| STC-12-1 | 1130                                               | 223                                                  | 907                                                 |
| STC-20-1 | 1167                                               | 265                                                  | 902                                                 |

The volume  $V_x$  occupied by a single IL molecule can be estimated by applying the **Equation (S1)**:

$$V_x = \frac{M}{\rho N_A} \quad [\text{cm}^3] \quad (\text{S1}),$$

where  $M$  is the molecular mass of  $[\text{EMIm}^+][\text{FSI}^-]$  equal to  $291 \text{ g mol}^{-1}$ ,  $\rho$  – density of  $[\text{EMIm}^+][\text{FSI}^-]$  of  $1.44 \text{ g cm}^{-3}$ , and  $N_A$  – the Avogadro number, giving  $V_x = 336 \times 10^{-24} \text{ cm}^3$ . Since the ions in direct contact with the mesopore walls may be randomly oriented, the average volume of one molecule can be represented by a cube of side  $a_x = (336 \times 10^{-24})^{1/3} = 6.95 \times 10^{-8} \text{ [cm]}$ ; hence, the thickness of an IL monolayer is  $d_{\text{mono}} = 6.95 \times 10^{-8} \text{ [cm]}$ .

Henceforward, the volume occupied by the IL in direct contact with the walls,  $V_{\text{mono}}$ , can be calculated by applying the **Equation (S2)**:

$$V_{\text{mono}} = S_{\text{meso}} \times d_{\text{mono}} \times 10^4 \quad [\text{cm}^3 \text{g}^{-1}] \quad (\text{S2}),$$

giving  $V_{\text{mono}} = 0.63 \text{ cm}^3 \text{g}^{-1}$ , for the two carbons. Then, by subtracting  $V_{\text{mono}}$  from  $V_{\text{meso}}$  (see **Table 1**),  $V_{\text{meso}} - V_{\text{mono}}$  values of  $1.43$  and  $1.74 \text{ cm}^3 \text{g}^{-1}$  in IL@STC-12-1 and IL@STC-20-1, respectively, are obtained to represent the molecules located close to the mesopore center. Finally, the ratio of the volumes of  $[\text{EMIm}^+][\text{FSI}^-]$  in contact with the mesopore walls and located close to the mesopores center, viz.  $V_{\text{mono}} : (V_{\text{meso}} - V_{\text{mono}})$ , is  $0.44$  and  $0.36$  for IL@STC-12-1 and IL@STC-20-1, respectively.

## References:

1. A. Abragam, *The Principles of Nuclear Magnetism*, Clarendon Press, 1961
2. G. Hotová, V. Slovák, O. S. G. P. Soares, J. L. Figueiredo and M. F. R. Pereira, *Carbon*, 2018, **134**, 255-263.
3. U. Zielke, K. J. Hüttinger and W. P. Hoffman, *Carbon*, 1996, **34**, 983-998.
4. H. E. Bergna and W. O. Roberts, *Colloidal Silica: Fundamentals and Applications*, CRC Press, Boca Raton, 2005.
5. J. J. Biernacki and G. P. Wotzak, *J. Am. Ceram. Soc.*, 1989, **72**, 122-129.
